# Supplementary material for: A comparative analysis of the effects of containment policies on the epidemiological manifestation of the COVID-19 pandemic across nine European countries
Source: PubMed Central journal article supplement (PMC10356910; doi:10.1038/s41598-023-37751-4), 2023-07-19
Supplement: 41598_2023_37751_MOESM1_ESM.pdf [file 41598_2023_37751_MOESM1_ESM.pdf]

# Supplementary 1

## 1 Cross-Correlation Results

This section reports further results for cross-correlation analyses.

Figure 1 for France, Figure 2 for Germany, Figure 3 for Italy, Figure 4 for Spain, Figure 5 for United Kingdom. We show the results for some of the biggest European countries, even though Germany and Italy are missing information for the variable *admICU*, and United Kingdom is missing information for both variables *admHospital* and *admICU*.

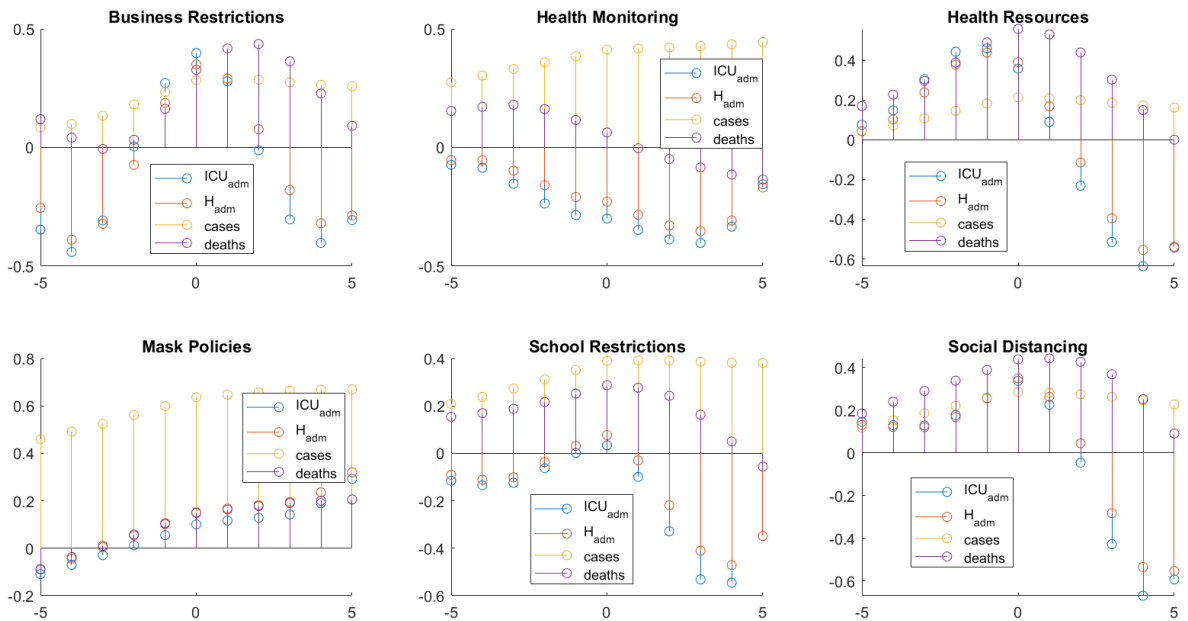

**Figure 1.** Cross-correlation between indices and epidemiological variables for France.  $x$  lag value,  $y$  cross-correlation value

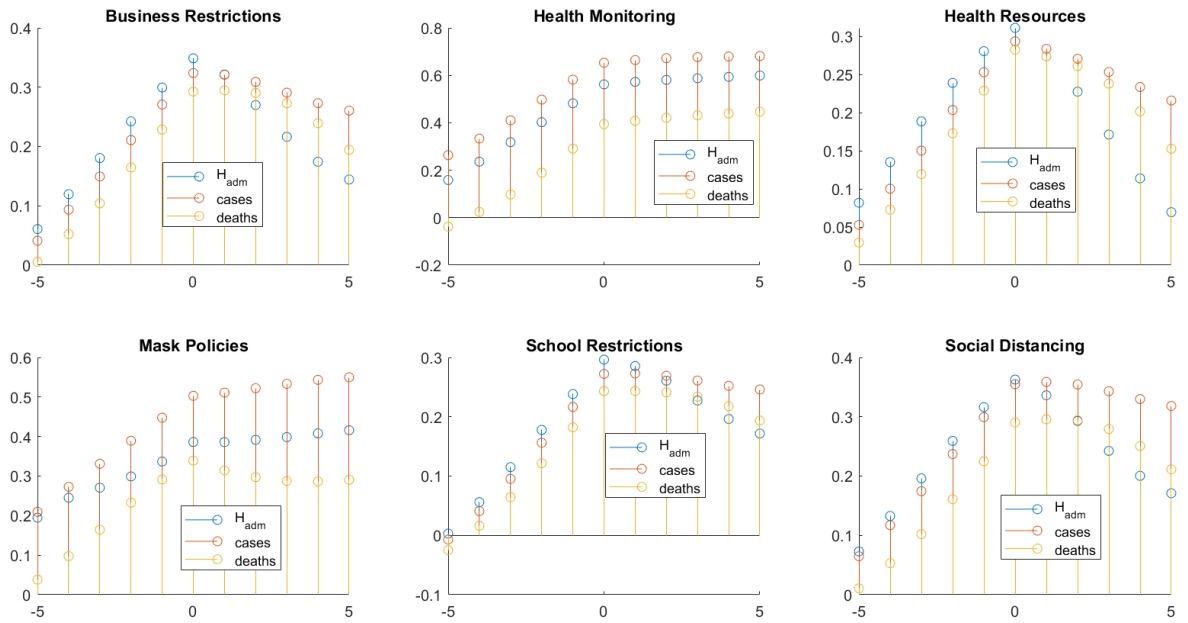

**Figure 2.** Cross-correlation between indices and epidemiological variables for Germany.  $x$  lag value,  $y$  cross-correlation value

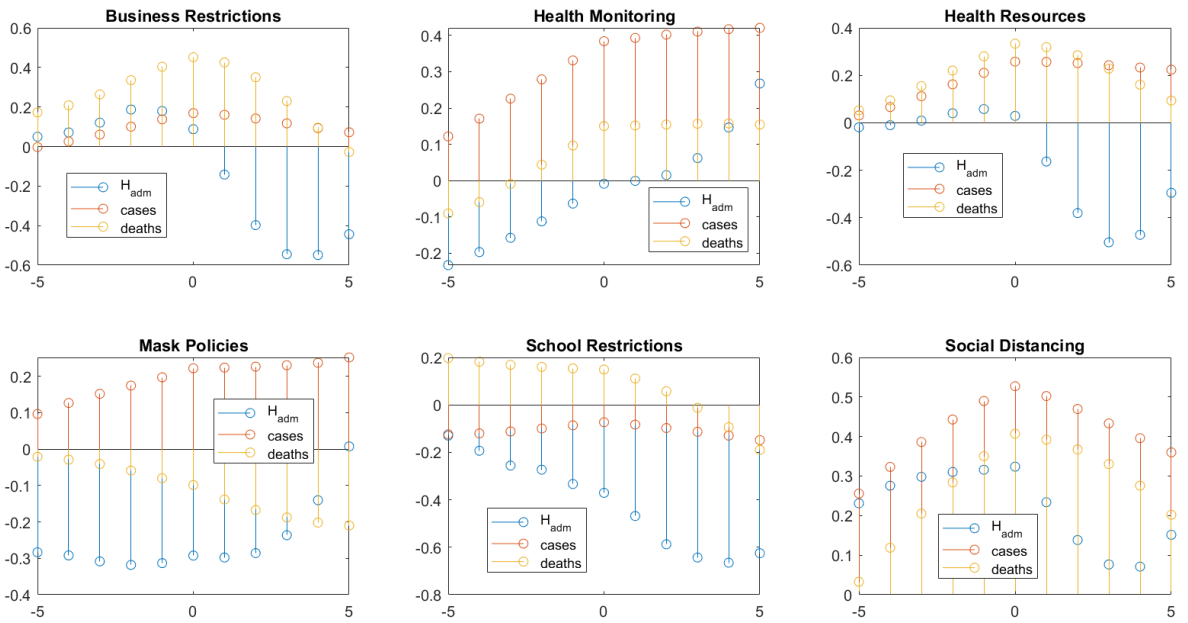

**Figure 3.** Cross-correlation between indices and epidemiological variables for Italy.  $x$  lag value,  $y$  cross-correlation value

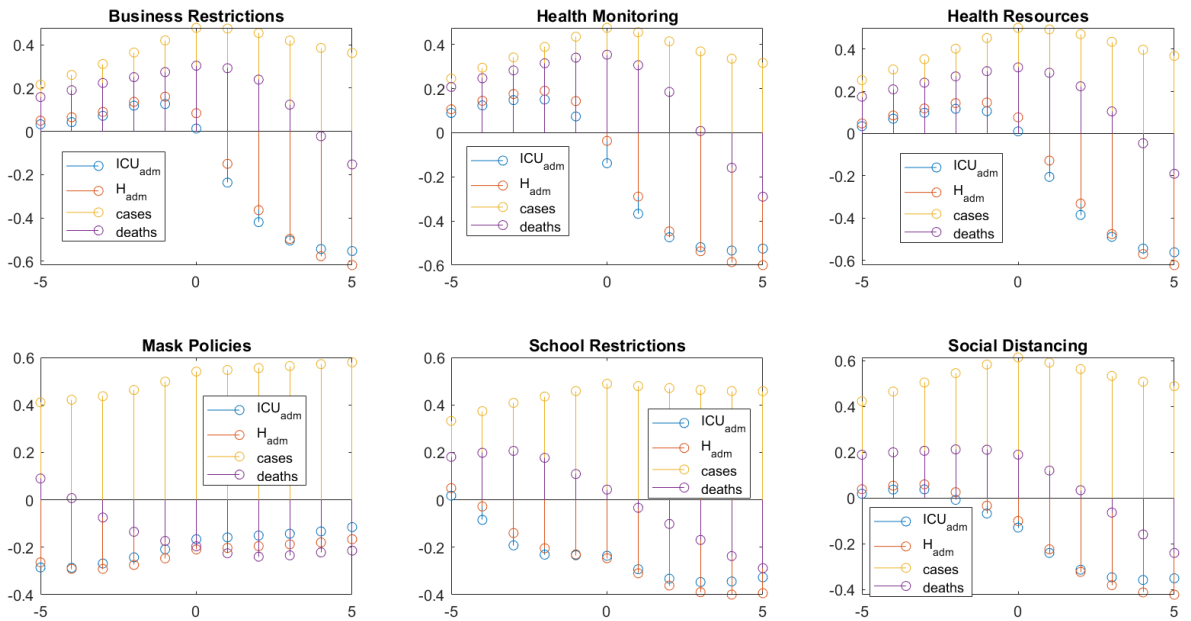

**Figure 4.** Cross-correlation between indices and epidemiological variables for Spain.  $x$  lag value,  $y$  cross-correlation value

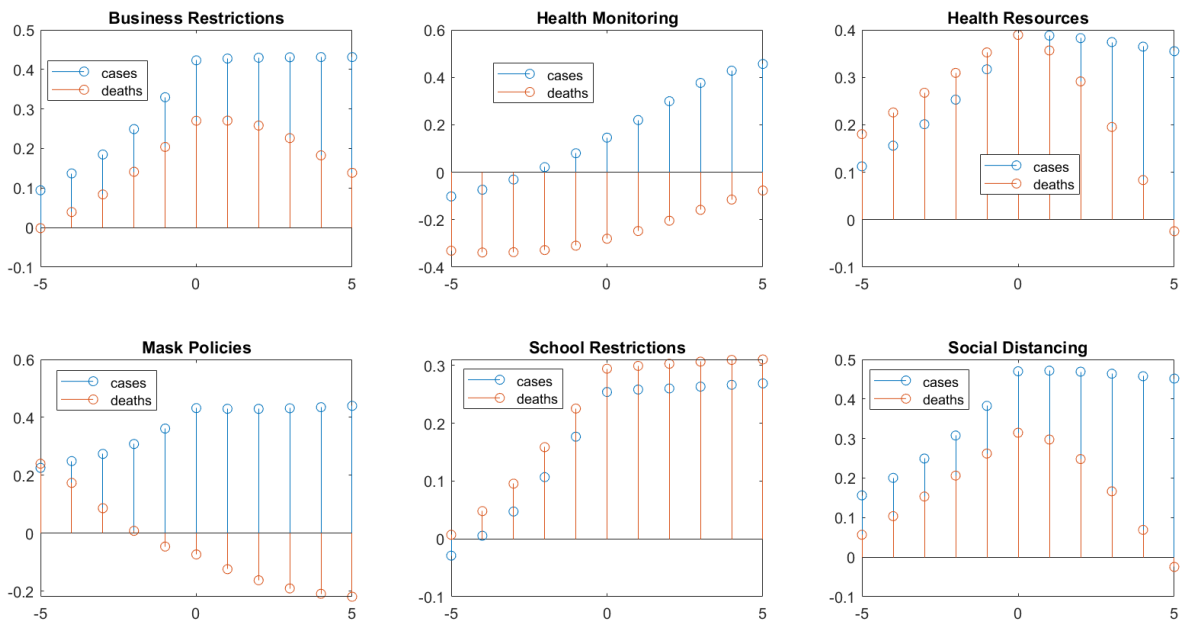

**Figure 5.** Cross-correlation between indices and epidemiological variables for UK.  $x$  lag value,  $y$  cross-correlation value
