# Supplementary material for: A comparative analysis of the effects of containment policies on the epidemiological manifestation of the COVID-19 pandemic across nine European countries
Source: PubMed Central journal article supplement (PMC10356910; doi:10.1038/s41598-023-37751-4), 2023-07-19
Supplement: 41598_2023_37751_MOESM2_ESM.pdf [file 41598_2023_37751_MOESM2_ESM.pdf]

## Supplementary 2

### 1 Fixed and Random Effects

In this section I report more results for the Fixed and Random Effects of the population model for the remaining predictive models for the indices: Health Monitoring (Tables 2 and 3), Health Resources (Tables 4 and 5), Mask Policies (Tables 6 and 7), School Restrictions (Tables 8 and 9), Social Distancing (Tables 10 and 11), and again, Business Restrictions (Tables 12 and 13). Table 1 shows the AIC and BIC results from the comparison between lag=1,2,3 for the mlvar models.

It is interesting to note that for all the models, in the **Fixed Effects**, the intercept has a very high *p-value*, so the constant effect that is found is not significant.

Instead, the lowest *p-value* is always associated to the Policy Intensity Index at time  $t - 1$ , and that is consistent with the fact that we do not expect the policy to change drastically from one week to another, so indeed the value of  $I(t)$  will be for sure influenced by the value of  $I(t - 1)$ , and the value of the coefficients for all the models are positive and higher than the other coefficients.

Other significant coefficients, thus with a *p-value*  $< 0.05$ , are the one for  $newCases(t - 1)$  ( $p = 0.044$ ) for Health Resources, meaning that a strong indicator for making decision in that context is the simple trend of the infections;  $admHosp(t - 1)$  ( $p = 0.035$ ) and  $deaths(t - 1)$  ( $p = 0.04$ ) have a significant coefficient for Social Distancing. In Business Restrictions, there are low *p-values* associated to  $admICU(t - 1)$  ( $p = 0.024$ ) and  $deaths(t - 1)$ , ( $p = 0.004$ ).

Health Monitoring has the coefficients for  $deaths(t - 1)$  with  $p = 0.118$ , and Mask Policies  $newCases(t - 1)$  with  $p = 0.076$ , while School Restrictions does not show any coefficient with a significant *p-value*.

In all the cases, the coefficients have values close to zero.

About the **Random Effects** results, there is an interesting feature on which to focus: for some variables, there is no random effects variability between the individuals. For example, in Mask Policies, the variable  $deaths(t - 1)$  is considered with the same influence for all the countries, as well as  $newCases(t - 1)$ ,  $admHosp(t - 1)$ ,  $admICU(t - 1)$  for School Restrictions and Social Distancing;  $newCases(t - 1)$  and  $admHosp(t - 1)$  for Business Restrictions. The indices Health Monitoring and Health Resources show inter-individual variability for all the variables at  $t - 1$ .

| $I(t)$ mlvar model | Business Restrictions |             | Health Monitoring |               | Health Resources |               | Mask Policies |               | School Restrictions |             | Social Distancing |               |
|--------------------|-----------------------|-------------|-------------------|---------------|------------------|---------------|---------------|---------------|---------------------|-------------|-------------------|---------------|
|                    | AIC                   | BIC         | AIC               | BIC           | AIC              | BIC           | AIC           | BIC           | AIC                 | BIC         | AIC               | BIC           |
| lag 1              | <b>-44.9</b>          | <b>21.5</b> | <b>-938.2</b>     | <b>-871.7</b> | <b>-707.7</b>    | <b>-641.1</b> | <b>-204.7</b> | <b>-138.1</b> | <b>-9.3</b>         | <b>57.1</b> | <b>-282.7</b>     | <b>-216.2</b> |
| lag 2              | 162.5                 | 228.6       | -587.9            | -521.7        | -269.9           | -203.8        | 157.5         | 223.6         | 151.0               | 217.1       | 28.1              | 94.2          |
| lag 3              | 179.5                 | 245.2       | -315.9            | -250.2        | -118.2           | -52.5         | 262.2         | 327.9         | 111.2               | 176.9       | 162.0             | 227.7         |

**Table 1.** Lag comparison for  $I(t)$  mlvar models between lag = 1, 2, 3. Lowest AIC and BIC detect the best model between the three performed.

| Fixed Effects $HM(t) \sim$ |         |           |          |
|----------------------------|---------|-----------|----------|
| Parameter                  | value   | SE        | p-value  |
| Intercept                  | 0.015   | 0.519     | 0.932    |
| $I(t-1)$                   | 0.688   | 0.358     | 3.92e-04 |
| $newCases(t-1)$            | -0.017  | 5.659e-02 | 0.458    |
| $admHosp(t-1)$             | -0.0502 | 0.129     | 0.335    |
| $admICU(t-1)$              | 0.082   | 0.246     | 0.332    |
| $deaths(t-1)$              | 0.024   | 0.032     | 0.118    |

**Table 2.** Fixed effects of the population model for the **Health Monitoring** considered as Policy Intensity Index

| Random Effects $HM(t) \sim$ |           |           |                  |                 |                |                |
|-----------------------------|-----------|-----------|------------------|-----------------|----------------|----------------|
| ID                          | Intercept | $I_{t-1}$ | $newCases_{t-1}$ | $admHosp_{t-1}$ | $admICU_{t-1}$ | $deaths_{t-1}$ |
| Spain                       | 0.254     | 0.323     | -0.134           | -0.312          | 0.677          | 0.045          |
| France                      | 0.822     | 0.218     | 0.026            | 0.015           | -0.091         | 0.029          |
| Netherlands                 | -0.281    | 0.014     | 0.021            | 0.027           | -0.073         | -2.01e-02      |
| Latvia                      | 0.277     | 0.029     | 0.009            | 0.045           | -0.081         | 7.39e-05       |
| Slovenia                    | -0.538    | -0.034    | 0.0133           | 0.043           | -0.072         | -2.44e-02      |
| Greece                      | -0.932    | 0.02      | 0.017            | 0.051           | -0.092         | -1.34e-02      |
| Ireland                     | 0.550     | -0.532    | 0.019            | 0.042           | -0.107         | -1.49e-02      |
| Cyprus                      | 0.096     | -0.011    | 0.012            | 0.048           | -0.083         | -2.23e-03      |
| Estonia                     | -0.247    | -0.027    | 0.016            | 0.04            | -0.079         | 3.93e-05       |

**Table 3.** Random effects of the population model for the **Health Monitoring** considered as Policy Intensity Index

| Fixed Effects $HR(t) \sim$ |        |       |          |
|----------------------------|--------|-------|----------|
| Parameter                  | value  | SE    | p-value  |
| Intercept                  | 0.007  | 0.332 | 0.950    |
| $I(t-1)$                   | 0.771  | 0.207 | $\sim 0$ |
| $newCases(t-1)$            | -0.037 | 0.035 | 0.044    |
| $admHosp(t-1)$             | -0.019 | 0.150 | 0.754    |
| $admICU(t-1)$              | 0.062  | 0.241 | 0.461    |
| $deaths(t-1)$              | -0.007 | 0.049 | 0.767    |

**Table 4.** Fixed effects of the population model for the **Health Resources** considered as Policy Intensity Index

| <b>Random Effects <math>HR(t) \sim</math></b> |                  |           |                  |                 |                |                |
|-----------------------------------------------|------------------|-----------|------------------|-----------------|----------------|----------------|
| <b>ID</b>                                     | <b>Intercept</b> | $I_{t-1}$ | $newCases_{t-1}$ | $admHosp_{t-1}$ | $admICU_{t-1}$ | $deaths_{t-1}$ |
| <i>Spain</i>                                  | 0.143            | 0.172     | -0.049           | -0.337          | 0.571          | 0.084          |
| <i>France</i>                                 | 0.059            | -0.076    | -0.027           | -0.047          | 0.101          | -0.036         |
| <i>Netherlands</i>                            | 0.155            | 0.073     | 0.021            | 0.070           | -0.051         | -0.037         |
| <i>Latvia</i>                                 | 0.578            | 0.219     | -0.001           | 0.003           | -0.043         | 0.007          |
| <i>Slovenia</i>                               | -0.203           | -0.420    | 0.023            | 0.014           | -0.044         | 0.005          |
| <i>Greece</i>                                 | -0.614           | 0.115     | 0.004            | 0.041           | -0.070         | 0.0001         |
| <i>Ireland</i>                                | 0.307            | -0.127    | 0.019            | 0.122           | -0.353         | -0.028         |
| <i>Cyprus</i>                                 | -0.191           | -0.005    | 0.011            | 0.053           | -0.044         | 0.002          |
| <i>Estonia</i>                                | -0.234           | 0.048     | -0.003           | 0.079           | -0.064         | 0.002          |

**Table 5.** Random effects of the population model for the **Health Resources** considered as Policy Intensity Index

| <b>Fixed Effects <math>MP(t) \sim</math></b> |              |           |                |
|----------------------------------------------|--------------|-----------|----------------|
| <b>Parameter</b>                             | <b>value</b> | <b>SE</b> | <b>p-value</b> |
| <i>Intercept</i>                             | 0.008        | 0.528     | 0.966          |
| $I(t-1)$                                     | 0.951        | 0.066     | $\sim 0$       |
| $newCases(t-1)$                              | 0.021        | 3.38e-06  | 0.283          |
| $admHosp(t-1)$                               | 0.075        | 1.44e-01  | 0.299          |
| $admICU(t-1)$                                | -0.119       | 1.55e-01  | 0.076          |
| $deaths(t-1)$                                | 0.003        | 0         | 0.798          |

**Table 6.** Fixed effects of the population model for the **Mask Policies** considered as Policy Intensity Index

| <b>Random Effects <math>MP(t) \sim</math></b> |                  |           |                  |                 |                |                |
|-----------------------------------------------|------------------|-----------|------------------|-----------------|----------------|----------------|
| <b>ID</b>                                     | <b>Intercept</b> | $I_{t-1}$ | $newCases_{t-1}$ | $admHosp_{t-1}$ | $admICU_{t-1}$ | $deaths_{t-1}$ |
| <i>Spain</i>                                  | 0.414            | 0.002     | -2.52e-10        | -0.092          | 0.075          | 0              |
| <i>France</i>                                 | 0.997            | 0.014     | -1.27e-10        | -0.068          | 0.062          | 0              |
| <i>Netherlands</i>                            | 0.205            | -0.091    | 5.07e-10         | 0.089           | 0.029          | 0              |
| <i>Latvia</i>                                 | -0.110           | 0.092     | 1.28e-10         | 0.289           | -0.359         | 0              |
| <i>Slovenia</i>                               | -0.851           | -0.001    | -3.92e-11        | -0.021          | 0.048          | 0              |
| <i>Greece</i>                                 | -0.684           | -0.0003   | -2.14e-11        | -0.016          | 0.026          | 0              |
| <i>Ireland</i>                                | 0.225            | -0.010    | -8.18e-11        | -0.077          | -0.011         | 0              |
| <i>Cyprus</i>                                 | -0.002           | -0.001    | -5.13e-11        | -0.023          | 0.035          | 0              |
| <i>Estonia</i>                                | -0.194           | -0.004    | -6.29e-11        | -0.079          | 0.093          | 0              |

**Table 7.** Random effects of the population model for the **Mask Policies** considered as Policy Intensity Index

| <b>Fixed Effects <math>SR(t) \sim</math></b> |              |           |                |
|----------------------------------------------|--------------|-----------|----------------|
| <b>Parameter</b>                             | <b>value</b> | <b>SE</b> | <b>p-value</b> |
| <i>Intercept</i>                             | 0.009        | 0.645     | 0.965          |
| $I(t-1)$                                     | 0.765        | 0.139     | $\sim 0$       |
| $newCases(t-1)$                              | -0.006       | 0         | 0.739          |
| $admHosp(t-1)$                               | 0.002        | 0         | 0.954          |
| $admICU(t-1)$                                | -0.001       | 0         | 0.973          |
| $deaths(t-1)$                                | 0.004        | 6.44e-06  | 0.735          |

**Table 8.** Fixed effects of the population model for the **School Restrictions** considered as Policy Intensity Index

| <b>Random Effects <math>SR(t) \sim</math></b> |                  |           |                  |                 |                |                |
|-----------------------------------------------|------------------|-----------|------------------|-----------------|----------------|----------------|
| <b>ID</b>                                     | <b>Intercept</b> | $I_{t-1}$ | $newCases_{t-1}$ | $admHosp_{t-1}$ | $admICU_{t-1}$ | $deaths_{t-1}$ |
| <i>Spain</i>                                  | 0.531            | 1.70e-01  | 0                | 0               | 0              | 2.29e-09       |
| <i>France</i>                                 | 0.754            | 4.50e-02  | 0                | 0               | 0              | -1.01e-09      |
| <i>Netherlands</i>                            | 0.784            | 9.47e-02  | 0                | 0               | 0              | 2.16e-10       |
| <i>Latvia</i>                                 | 0.367            | -1.53e-01 | 0                | 0               | 0              | 9.015e-11      |
| <i>Slovenia</i>                               | -1.027           | -1.35e-01 | 0                | 0               | 0              | -1.68e-09      |
| <i>Greece</i>                                 | -0.784           | 1.07e-01  | 0                | 0               | 0              | -3.32e-11      |
| <i>Ireland</i>                                | 0.211            | 4.17e-02  | 0                | 0               | 0              | 1.30e-10       |
| <i>Cyprus</i>                                 | -0.239           | -8.41e-05 | 0                | 0               | 0              | 1.41e-11       |
| <i>Estonia</i>                                | -0.597           | -1.70e-01 | 0                | 0               | 0              | -1.50e-11      |

**Table 9.** Random effects of the population model for the **School Restrictions** considered as Policy Intensity Index

| <b>Fixed Effects <math>SD(t) \sim</math></b> |              |           |                |
|----------------------------------------------|--------------|-----------|----------------|
| <b>Parameter</b>                             | <b>value</b> | <b>SE</b> | <b>p-value</b> |
| <i>Intercept</i>                             | -0.007       | 0.754     | 0.977          |
| $I(t-1)$                                     | 0.787        | 0.161     | $\sim 0$       |
| $newCases(t-1)$                              | -0.018       | 0         | 0.178          |
| $admHosp(t-1)$                               | 0.059        | 0         | 0.035          |
| $admICU(t-1)$                                | -0.012       | 0         | 0.653          |
| $deaths(t-1)$                                | -0.071       | 0.083     | 0.040          |

**Table 10.** Fixed effects of the population model for the **Social Distancing** considered as Policy Intensity Index

| <b>Random Effects <math>SD(t) \sim</math></b> |                  |           |                  |                 |                |                |
|-----------------------------------------------|------------------|-----------|------------------|-----------------|----------------|----------------|
| <b>ID</b>                                     | <b>Intercept</b> | $I_{t-1}$ | $newCases_{t-1}$ | $admHosp_{t-1}$ | $admICU_{t-1}$ | $deaths_{t-1}$ |
| <i>Spain</i>                                  | 0.564            | 0.168     | 0                | 0               | 0              | 0.078          |
| <i>France</i>                                 | 0.866            | -0.180    | 0                | 0               | 0              | 0.051          |
| <i>Netherlands</i>                            | 0.366            | 0.157     | 0                | 0               | 0              | -0.049         |
| <i>Latvia</i>                                 | 0.106            | 0.147     | 0                | 0               | 0              | -0.027         |
| <i>Slovenia</i>                               | -0.786           | -0.078    | 0                | 0               | 0              | 0.063          |
| <i>Greece</i>                                 | -1.507           | 0.009     | 0                | 0               | 0              | 0.018          |
| <i>Ireland</i>                                | 0.312            | -0.036    | 0                | 0               | 0              | -0.169         |
| <i>Cyprus</i>                                 | -0.634           | 0.044     | 0                | 0               | 0              | 0.025          |
| <i>Estonia</i>                                | 0.712            | -0.231    | 0                | 0               | 0              | 0.009          |

**Table 11.** Random effects of the population model for the **Social Distancing** considered as Policy Intensity Index

| <b>Fixed Effects <math>BR(t) \sim</math></b> |              |           |                |
|----------------------------------------------|--------------|-----------|----------------|
| <b>Parameter</b>                             | <b>value</b> | <b>SE</b> | <b>p-value</b> |
| <i>Intercept</i>                             | 0.033        | 0.536     | 0.855          |
| $I(t-1)$                                     | 0.712        | 0.083     | 0.000          |
| $newCases(t-1)$                              | -0.036       | 0.019     | 0.060          |
| $admHosp(t-1)$                               | -0.011       | 0.051     | 0.836          |
| $admICU(t-1)$                                | 0.115        | 0.051     | 0.024          |
| $deaths(t-1)$                                | -0.121       | 0.042     | 0.004          |

**Table 12.** Fixed effects of the population model for the Business Restriction considered as Policy Intensity Index

**Random Effects  $BR(t) \sim$**

| <b>ID</b>          | <b>Intercept</b> | $I_{t-1}$ | $newCases_{t-1}$ | $admHosp_{t-1}$ | $admICU_{t-1}$ | $deaths_{t-1}$ |
|--------------------|------------------|-----------|------------------|-----------------|----------------|----------------|
| <i>Spain</i>       | 0.003            | 0.196     | 0                | 0               | 0.065          | 0.066          |
| <i>France</i>      | -0.052           | -0.096    | 0                | 0               | 0.0382         | -0.108         |
| <i>Netherlands</i> | -0.468           | -0.054    | 0                | 0               | 0.080          | -0.072         |
| <i>Latvia</i>      | 0.773            | -0.032    | 0                | 0               | -0.025         | 0.007          |
| <i>Slovenia</i>    | 0.190            | -0.469    | 0                | 0               | -0.057         | 0.109          |
| <i>Greece</i>      | -1.092           | 0.140     | 0                | 0               | -0.0003        | 0.031          |
| <i>Ireland</i>     | 0.619            | 0.182     | 0                | 0               | -0.048         | -0.064         |
| <i>Cyprus</i>      | -0.251           | 0.002     | 0                | 0               | 0.002          | 0.009          |
| <i>Estonia</i>     | 0.280            | 0.133     | 0                | 0               | -0.055         | 0.021          |

**Table 13.** Random effects of the population model for the Business Restriction considered as Policy Intensity Index
